# Supplementary material for: Hydrogen sulfide stimulates Mycobacterium tuberculosis respiration, growth and pathogenesis
Source: PubMed Central journal article supplement (PMC6987094; doi:10.1038/s41467-019-14132-y), 2020-01-28
Supplement: 41467_2019_14132_MOESM1_ESM.pdf [file 41467_2019_14132_MOESM1_ESM.pdf]

## Supplementary Information

Hydrogen sulfide stimulates *Mycobacterium tuberculosis* respiration, growth and pathogenesis

Saini, *et al.*

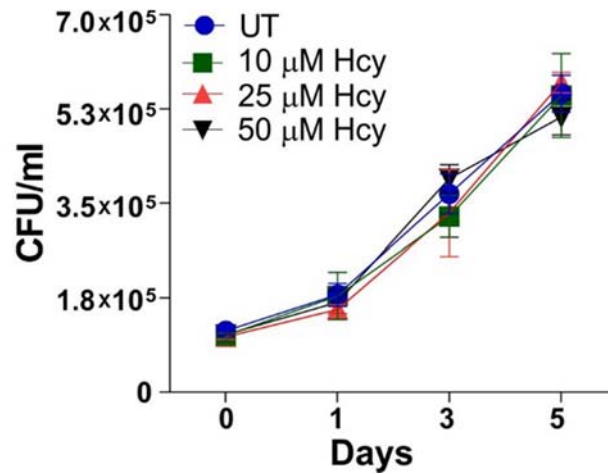

**Supplementary Figure 1. Effect of homocysteine (Hcy) on *Mtb* infection.** Peritoneal macrophages treated with Hcy have similar bacterial recovery as that of untreated (UT) cells. Data are representative of assays performed at least twice. Data are shown as mean  $\pm$  SEM and were analyzed using one-way ANOVA with Sidak's multiple comparisons test to determine differences compared to UT at each time point. No statistically significant differences were observed between treatment groups at any time point (n=4 per group).

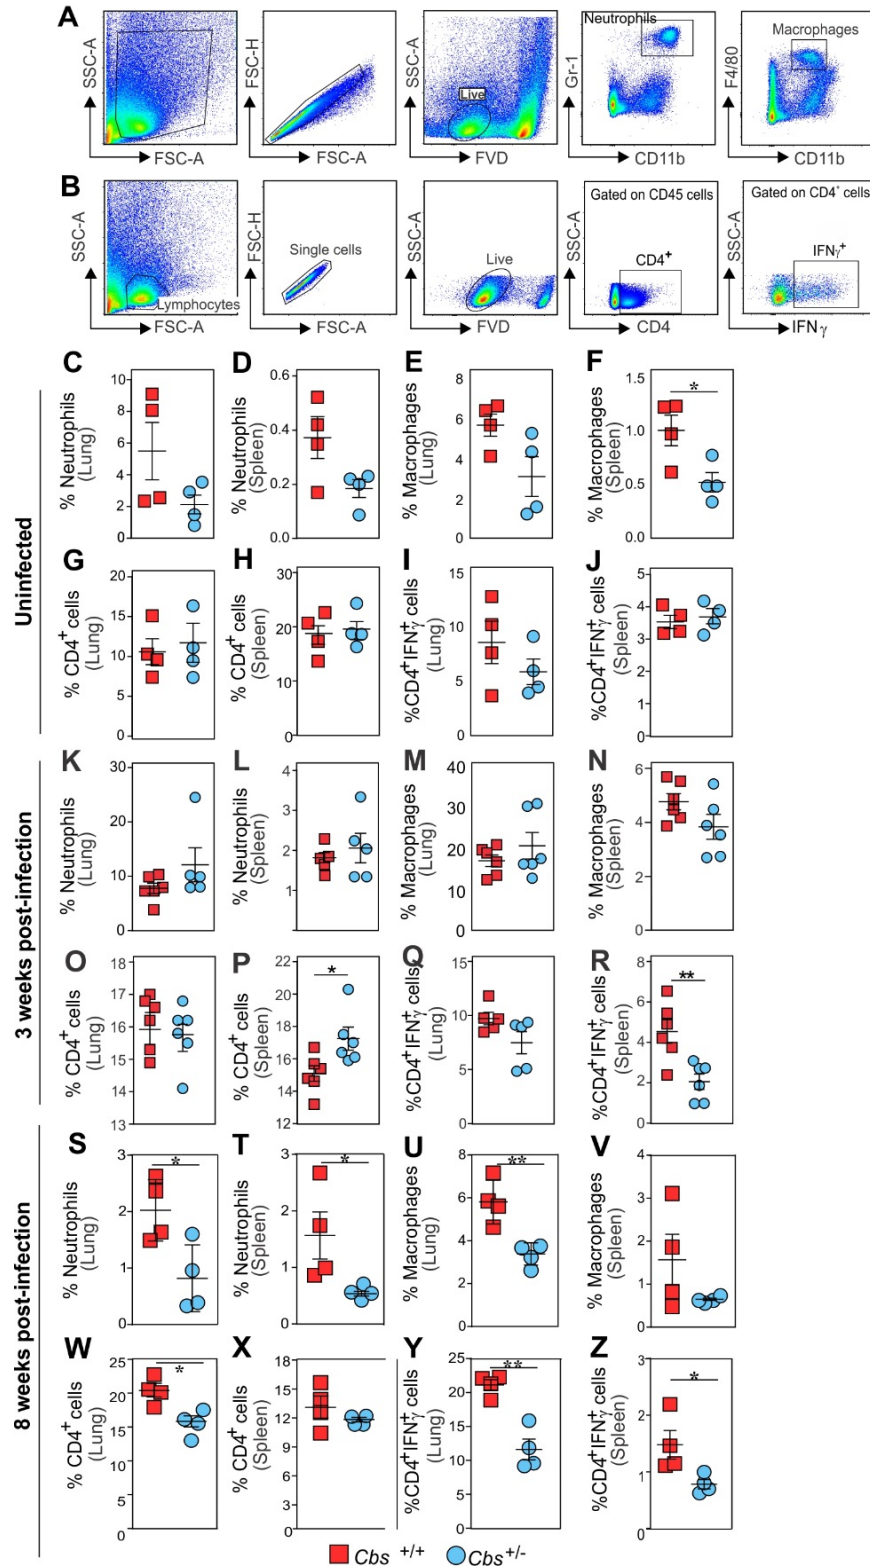

**Supplementary Figure 2. Gating strategy and immune responses in WT and *Cbs*<sup>+/-</sup> mice.** (A, B) The sequential flow cytometry gating strategy used for the identification of murine myeloid and lymphoid cell populations. Percentage distribution of macrophages (CD11b<sup>+</sup>F4/80<sup>+</sup>), neutrophils (CD11b<sup>+</sup>Gr-1<sup>+</sup>), CD4<sup>+</sup>T-cells and CD4<sup>+</sup>IFN $\gamma$ <sup>+</sup>T-cells in the lungs and spleens of uninfected (C-J) and 3 weeks (K-R) and 8 weeks (S-Z) post *Mtb*-infected WT and *Cbs*<sup>+/-</sup> mice. Data are shown as mean  $\pm$  SEM (n=4-6 animals per group). Data were analyzed using unpaired parametric t-test. \**P* < 0.05, \*\**P* < 0.

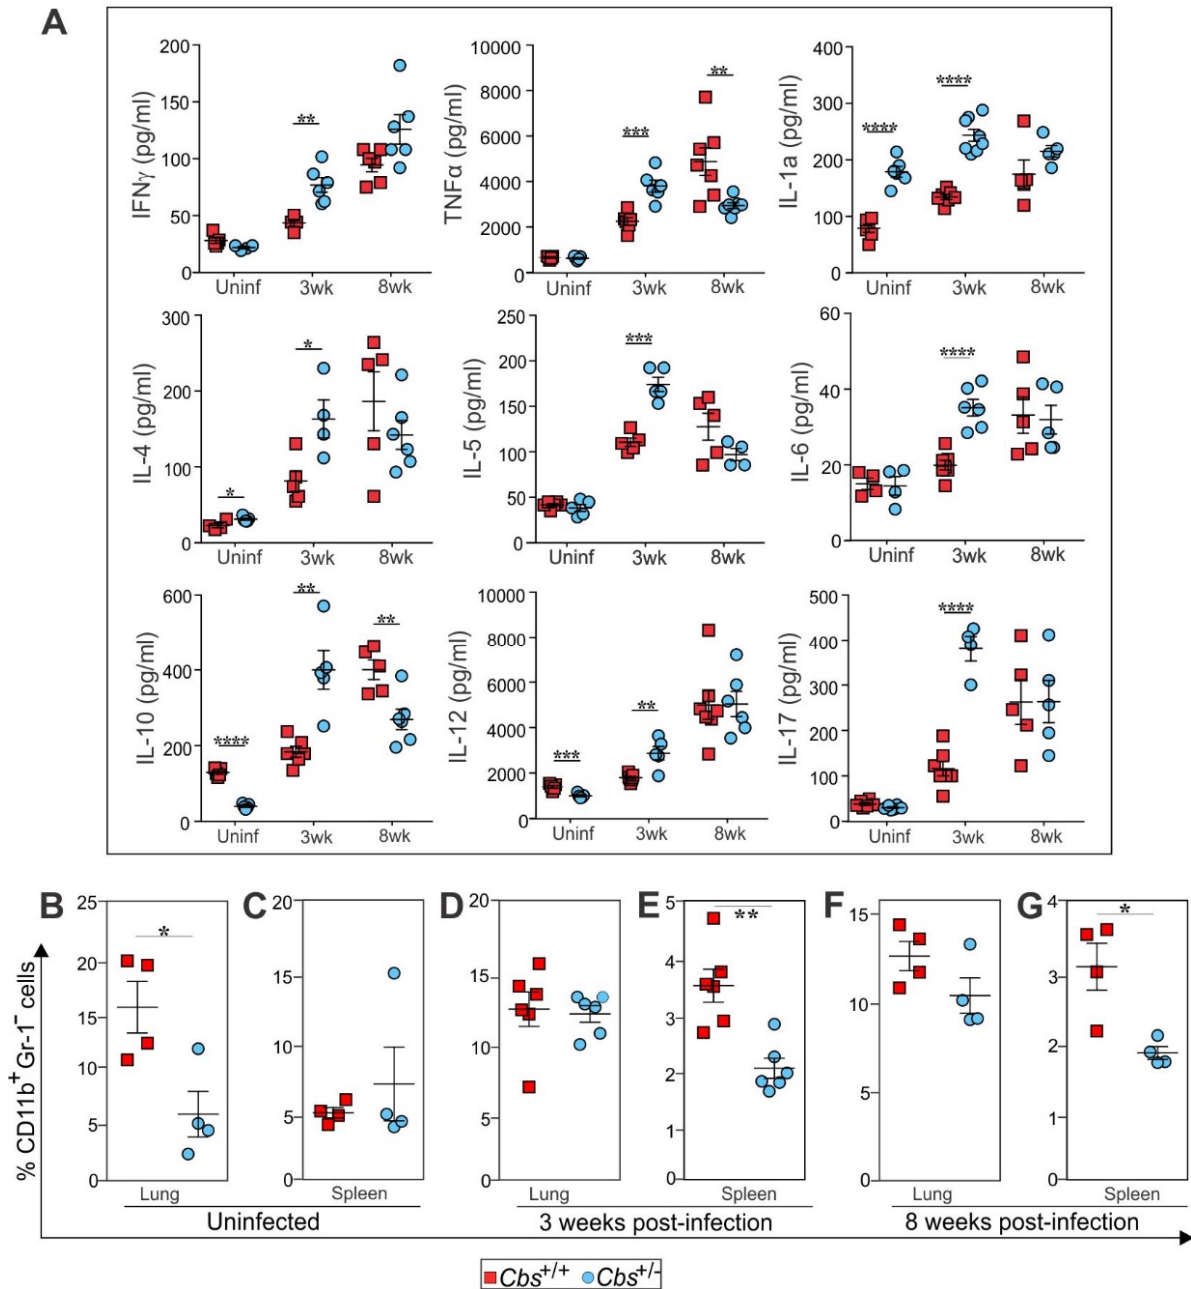

**Supplementary Figure 3. Cytokine analysis and flow cytometric characterization of CD11b<sup>+</sup>Gr-1<sup>-</sup> Cells in *Mtb*-infected mice. (A)** Cytokine levels in the sera of mice without or with infection (3 wk and 8 wk). For the analysis of immune cells, the sequential gating strategy represented in Supplementary Figure Fig. 2A, B was used. Of the total number of live CD11b<sup>+</sup> cells, neutrophils (CD11b<sup>+</sup>Gr-1<sup>+</sup>) were gated out and the remaining CD11b<sup>+</sup> cells were plotted. Percent CD11b<sup>+</sup>Gr-1<sup>-</sup> cells in the lungs and spleens of (B, C) uninfected and *Mtb*-infected *Cbs*<sup>+/+</sup> and *Cbs*<sup>+/-</sup> mice at (D, E) 3 weeks and (F, G) 8 weeks post infection. Data are shown as mean  $\pm$  SEM (4-7 animals per group) and were analyzed by unpaired parametric t-test to determine differences between genotypes in each organ or time point. \**P* < 0.05, \*\**P* < 0.01, \*\*\**P* < 0.001, \*\*\*\**P* < 0.0001

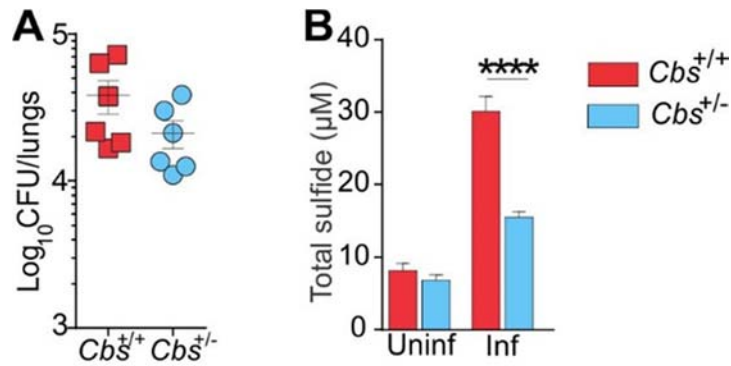

**Supplementary Figure 4. CFU recovery and serum sulfide 3 weeks post-infection. (A)** CFU recovery from *Mtb*-infected WT and *Cbs*<sup>+/-</sup> mice lungs at 3 wk post-infection. Data represent the mean ± SEM (n=6 animals per group). **(B)** Total sulfide levels in the sera of uninfected and infected mice at 3 wk post-infection. Data represent the mean ± SD (n=6 animals per group). All data were analyzed by unpaired parametric t-test to detect differences between genotypes under each condition.

\*\*\*\* $P < 0.0001$

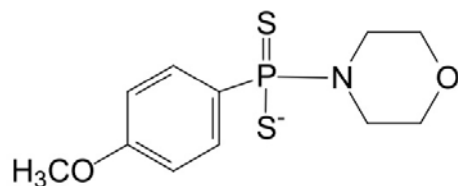

**GYY4137**

C<sub>11</sub>H<sub>15</sub>NO<sub>2</sub>PS<sub>2</sub>

288.34

288.028186

C 45.82% H 5.24% N 4.86% O 11.10% P 10.74% S 22.24%

C<sub>11</sub>H<sub>16</sub>NO<sub>2</sub>PS<sub>2</sub>

289.036011

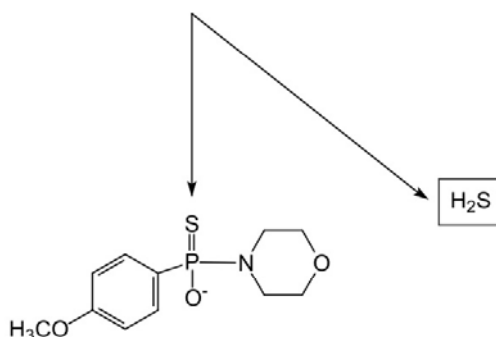

C<sub>11</sub>H<sub>15</sub>NO<sub>3</sub>PS

272.28

272.051029

C 48.52% H 5.55% N 5.14% O 17.63% P 11.38% S 11.77%

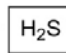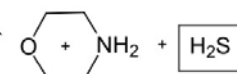

**Morpholine (M+H)<sup>+</sup>**

C<sub>4</sub>H<sub>10</sub>NO

88.13

88.076239

C 54.52% H 11.44% N 15.89% O 18.15%

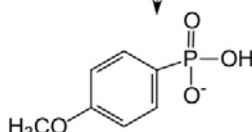

C<sub>7</sub>H<sub>8</sub>O<sub>4</sub>P

187.11

187.016022

C 44.93% H 4.31% O 34.20% P 16.55%

**Supplementary Figure 5. Decomposition of GYY4137 into its corresponding breakdown products.** High-resolution mass spectrometry was used to identify the breakdown products of GYY4137, with *m/z* of 272.05 (M-H)<sup>-</sup>, 187.02 (M-H)<sup>-</sup> and 88.08 (morpholine M+H)<sup>+</sup> from *Mtb* cells exposed to GYY4137. Although the product ion 272.05, thought to be relatively unstable, was not found, both 187.02 and 88.08 ions were identified.

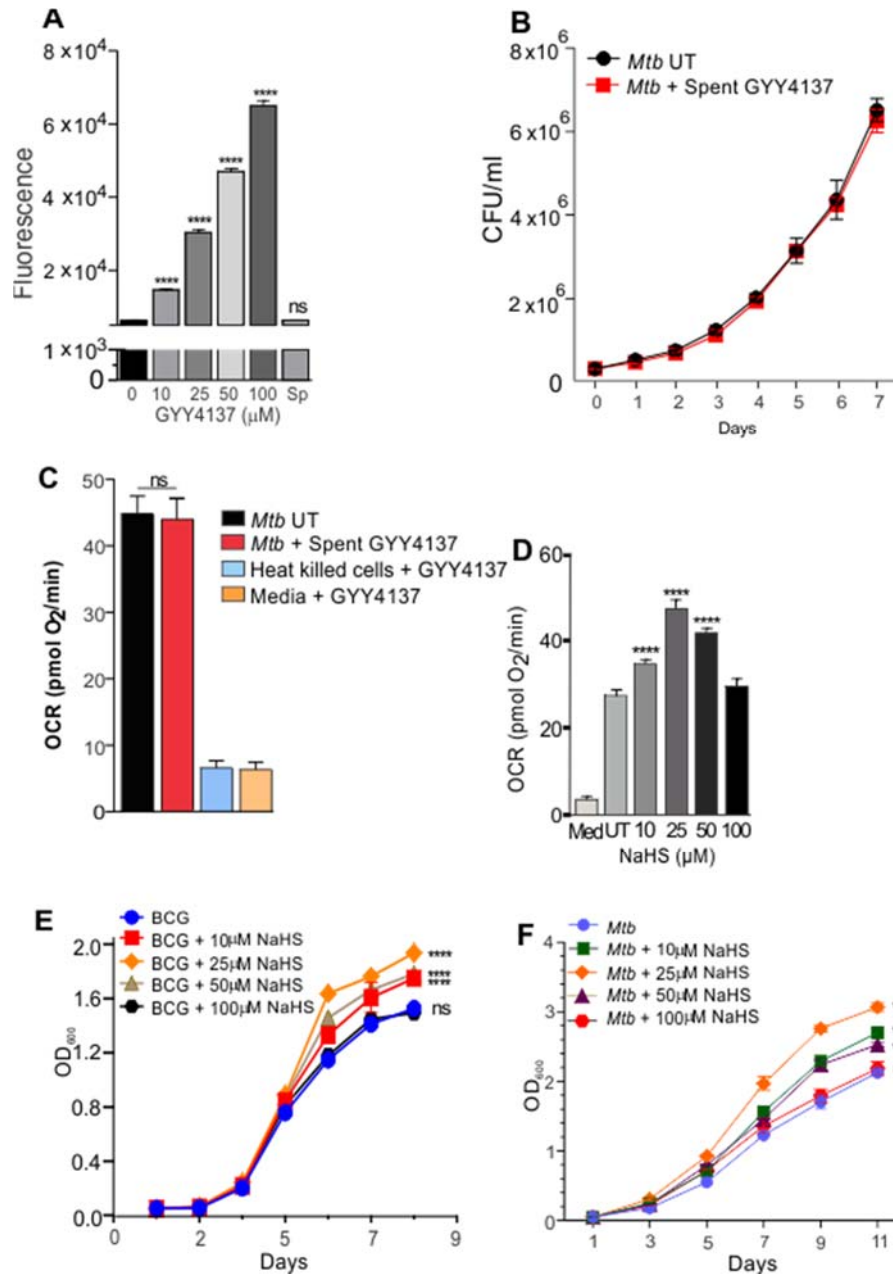

**Supplementary Figure 6. Growth and bioenergetic profiles of mycobacterial cells receiving spent donor GYY4137 or NaHS. (A)** Ratiometric quantitation of GYY4137-generated H<sub>2</sub>S using the H<sub>2</sub>S-specific fluorescent probe WSP1 in mycobacterial culture medium (n=8 per group). Spent (Sp) GYY4137 does not generate H<sub>2</sub>S. **(B)** CFU-based growth profiles of *Mtb* cells performed in duplicate. Untreated (UT) *Mtb* cells received vehicle only while exposed cells received spent GYY4137 (25 μM). **(C)** OCR of live and heat-killed *Mtb* cells. Heat-killed cells and wells with media only (Med) received active GYY4137 (n=6-10 per group). **(D)** OCR of *M. bovis* BCG cells exposed to various concentrations of NaHS in an Oroboros O2-K chamber (n=4-6 per group). Untreated (UT) cells received vehicle without NaHS. Media only (Med) controls received 25 μM NaHS without cells. **(E)** Growth profiles of *M. bovis* BCG and **(F)** *Mtb* cells exposed to different concentrations of NaHS (n=3 per group). Data represent the mean ± SEM **(A)** and **(F)** or mean ± SD **(B)-(E)** and were analyzed using One-way ANOVA with Sidak's multiple comparisons test **(A, C, D)**, Holm-Sidak multiple comparisons test **(B)**, or two-way ANOVA with Tukey's multiple comparisons test **(E)** and **(F)**.

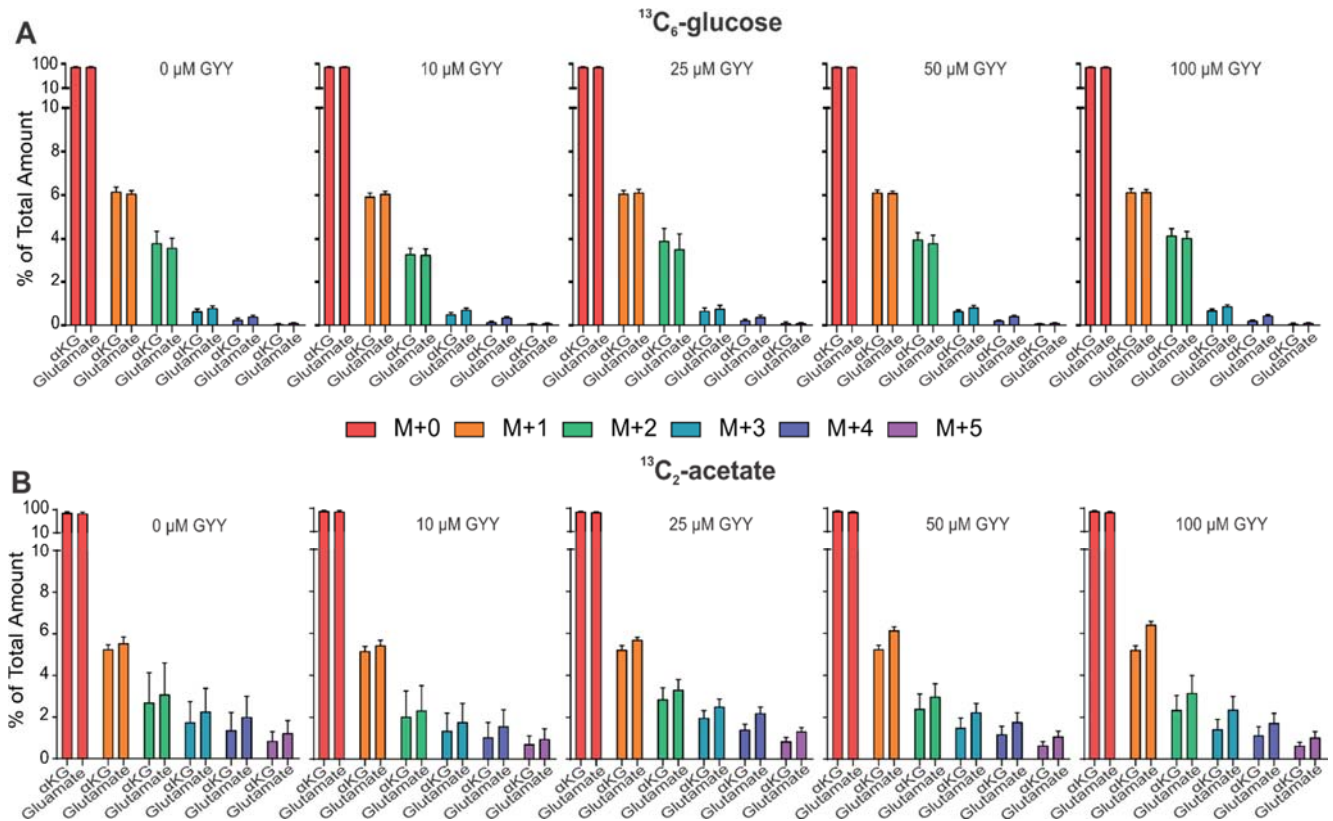

**Supplementary Figure 7. Metabolic steady state during GYY4137 exposure.** Isotopologue distribution of  $\alpha$ -ketoglutarate ( $\alpha$ KG) compared to the isotopologue distribution of glutamate at all GYY4137 concentrations used in the presence of <sup>13</sup>C<sub>6</sub>-glucose (A) and <sup>13</sup>C<sub>2</sub>-acetate (B) as carbon sources. There is no significant difference between the isotopologues of  $\alpha$ -ketoglutarate and glutamate showing that the TCA cycle remains in steady state over the range of GYY4137 concentrations used. Data sets are shown as the mean  $\pm$  SD (n=4 per group) and were examined using two-way ANOVA with Sidak's multiple comparisons test.



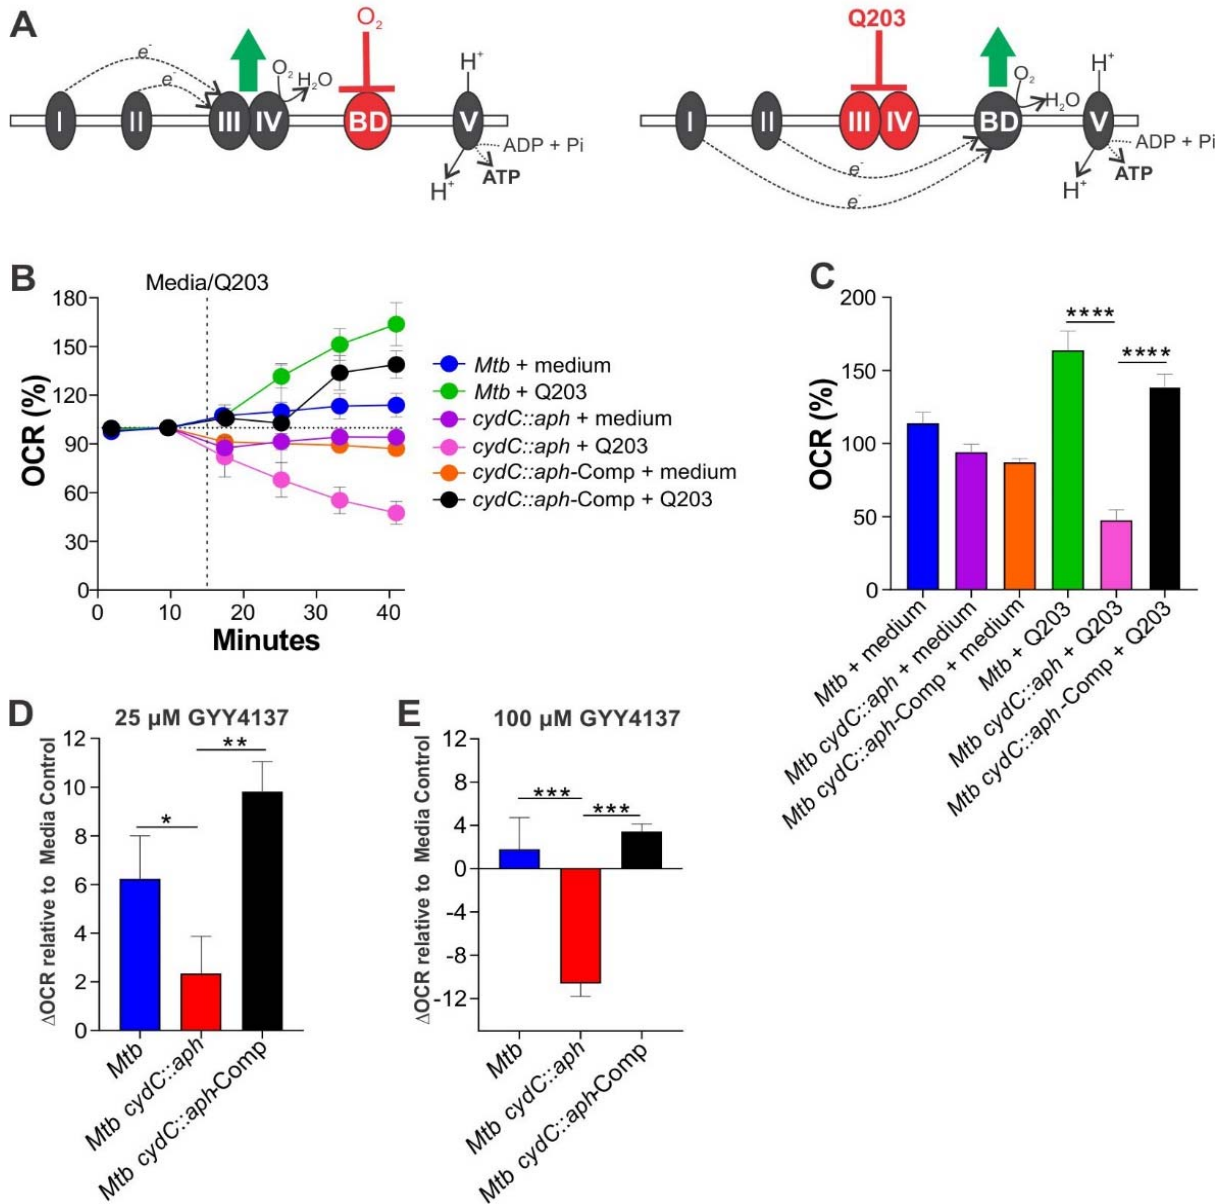

**Supplementary Figure 8. Genetic complementation of *Mtb cydC::aph*.** (A) CytBD is functional under hypoxic conditions, whereas cytochrome *bc<sub>1</sub>/aa<sub>3</sub>* (Complex III/IV) is functional under normoxic conditions. Complementation of *Mtb cydC::aph* was demonstrated using Q203, which inhibits cytochrome *bc<sub>1</sub>* under normoxic conditions to reroute electrons to CytBD and is evident by an increase in respiration that can be measured by the Agilent Seahorse XF96 Extracellular Flux Analyzer (B) and (C). Exposure of WT *Mtb* cells to Q203 increases respiration whereas exposure of *Mtb cydC::aph* cells to Q203 show a reduction in OCR as cytochrome *bc<sub>1</sub>* and CytBD are nonfunctional. In contrast, complementation of *Mtb cydC::aph* with a WT copy of *cydC* restored the OCR to near WT levels (B and C) when exposed to Q203. Furthermore, exposure of *Mtb* strains to 25  $\mu$ M GYY4137 (D) or 100  $\mu$ M GYY4137 (E) significantly reduced OCR compared to WT *Mtb* and the *Mtb cydC::aph-Comp* clone, demonstrating complementation. Experiments were performed independently at least twice.  $\Delta$ OCR; the OCR for the media control was subtracted from the OCR for each condition (X-axis). Data shows mean  $\pm$  SD (n=3-6 per group). Statistical differences (C-E) were determined using one-way ANOVA with Tukey's multiple comparisons test. \* $P < 0.05$ , \*\* $P < 0.01$ , \*\*\* $P < 0.001$ , \*\*\*\* $P < 0.0001$

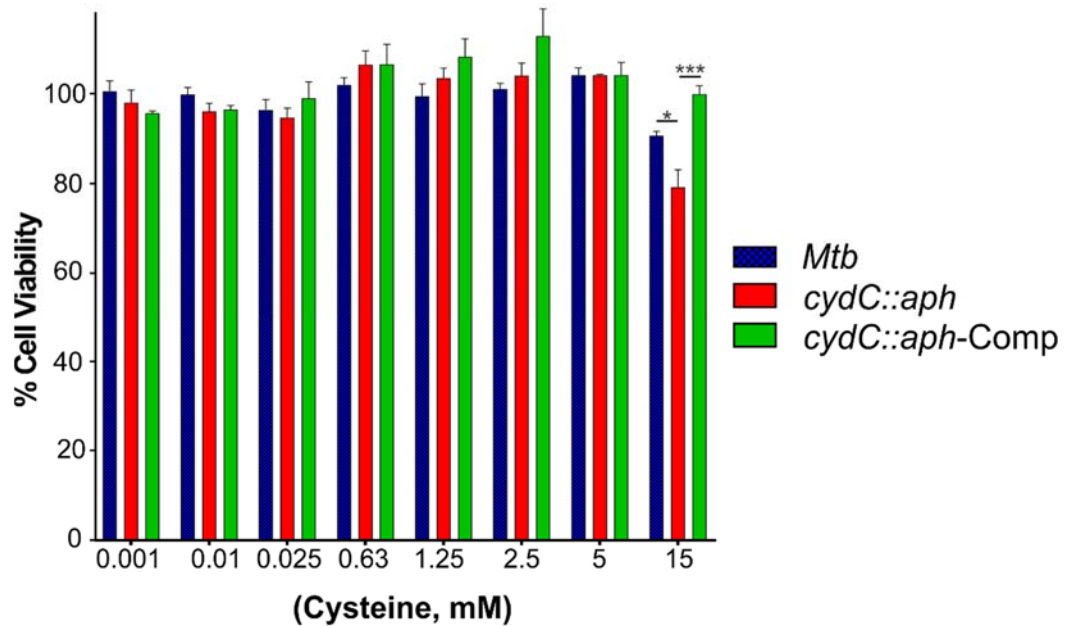

**Supplementary Figure 9. Contribution of *Mtb* CydC to resistance against cysteine.** *Mtb* cells were treated with various concentrations of cysteine followed by exposure to Alamar blue. Physiological concentrations of cysteine [ $\sim$ 128  $\mu$ M and  $\sim$ 250  $\mu$ M in human cells and plasma, respectively; (42, 43)] do not affect *Mtb* viability. Significant differences were observed only at 15 mM Cys between the *cydC::aph* and *Mtb* groups, and *cydC::aph-Comp* and *cydC::aph* groups. Data are shown as  $\pm$ SEM (n=3 per group). Data was analyzed using two-way ANOVA with Tukey's multiple comparisons test. \* $P < 0.05$ , \*\*\* $P < 0.001$ .

| A | Gene ID | Fold change | Description                                  | Gene ID | Fold change | Description                                   |
|---|---------|-------------|----------------------------------------------|---------|-------------|-----------------------------------------------|
|   | rv0061c | 1.67        | Hypothetical protein                         | rv2029c | 1.63        | 6-phosphofructokinase (PfkB)                  |
|   | rv0079  | 2.18        | Hypothetical protein                         | rv2030c | 3.89        | Hypothetical protein                          |
|   | rv0080  | 2.83        | Hypothetical protein                         | rv2031c | 1.81        | Alpha-crystallin                              |
|   | rv0081  | 1.56        | HTH-type transcriptional regulator           | rv2032  | 3.02        | NAD(P)H nitroreductase                        |
|   | rv0186  | 3.31        | Beta-glucosidase (BglS)                      | rv2056c | 1.68        | 30S ribosomal protein S14                     |
|   | rv0186A | 5.92        | Metallothionein (MymT)                       | rv2220  | 1.72        | Glutamine synthetase                          |
|   | rv0187  | 2.38        | O-methyltransferase                          | rv2243  | 1.59        | Malonyl CoA-acyl carrier protein transacylase |
|   | rv0211  | 1.54        | Phosphoenolpyruvate carboxykinase (PckA)     | rv2244  | 2.05        | Meromycolate extension acyl carrier protein   |
|   | rv0440  | 1.55        | Molecular chaperone GroEL2                   | rv2245  | 1.66        | 3-oxoacyl-ACP synthase 1                      |
|   | rv0467  | 1.51        | Isocitrate lyase 1                           | rv2428  | 2.51        | Alkyl hydroperoxide reductase subunit C       |
|   | rv0511  | -1.51       | Uroporphyrin-III C-methyltransferase (HemD)  | rv2450c | 1.81        | Resuscitation-promoting factor (RpfE)         |
|   | rv0512  | -1.56       | Delta-aminolevulinic acid dehydratase (HemB) | rv2451  | 2.13        | Proline/serine-rich protein                   |
|   | rv0513  | -1.66       | Transmembrane protein                        | rv2552c | -1.55       | Shikimate 5-dehydrogenase                     |
|   | rv0514  | -1.67       | Transmembrane protein                        | rv2553c | -1.51       | Membrane protein                              |
|   | rv0542c | -1.74       | 2-succinylbenzoic acid--CoA ligase (MenE)    | rv2623  | 3.26        | Universal stress protein                      |
|   | rv0814c | 1.90        | Putative sulfur metabolism (SseC2)           | rv2624c | 1.78        | Universal stress protein                      |
|   | rv0815c | 1.63        | Thiosulfate sulfurtransferase (CysA)         | rv2625c | 1.60        | Zinc metalloprotease (Rip3)                   |
|   | rv0846c | 2.29        | Oxidase                                      | rv2626c | 3.07        | Hypoxic response protein                      |
|   | rv0847  | 4.77        | Lipoprotein (LpqS)                           | rv2627c | 2.86        | Hypothetical protein                          |
|   | rv0848  | 3.24        | Cysteine synthase (CysK)                     | rv2628  | 1.54        | Hypothetical protein                          |
|   | rv0849  | 2.93        | Membrane transporter                         | rv2629  | 1.60        | Hypothetical protein                          |
|   | rv0967  | 1.73        | Transcriptional repressor (CsoR)             | rv2822c | 1.57        | CRISPR type III-associated protein (Csm2)     |
|   | rv0968  | 1.64        | Hypothetical protein                         | rv2902c | -1.57       | Ribonuclease HII                              |
|   | rv0969  | 1.51        | Copper transporter ATPase V (CtpV)           | rv2959c | 1.58        | Rhamnosyl O-methyltransferase                 |
|   | rv0991c | 1.73        | Hypothetical protein                         | rv2962c | 1.58        | PGL biosynthesis rhamnosyltransferase         |
|   | rv1013  | 1.84        | Polyketide synthase (Pks16)                  | rv2963  | 2.61        | Integral membrane protein                     |
|   | rv1014c | 1.57        | Peptidyl-tRNA hydrolase                      | rv3117  | 1.52        | Thiosulfate sulfurtransferase                 |
|   | rv1461  | 1.51        | Hypothetical protein                         | rv3118  | 1.60        | Hypothetical protein                          |
|   | rv1535  | 2.01        | Hypothetical protein                         | rv3127  | 2.31        | Hypothetical protein                          |
|   | rv1592c | 2.29        | Hypothetical protein                         | rv3130c | 1.81        | Diacylglycerol O-acyltransferase              |
|   | rv1711  | -1.52       | RNA pseudouridine synthase                   | rv3131  | 1.65        | NAD(P)H nitroreductase                        |
|   | rv1733c | 2.36        | Transmembrane protein                        | rv3132c | 1.76        | Sensor histidine kinase (DosS)                |
|   | rv1734c | 1.75        | Hypothetical protein                         | rv3133c | 1.94        | Transcriptional regulator (DosR)              |
|   | rv1735c | 1.76        | Membrane protein                             | rv3134c | 2.49        | Universal stress protein                      |
|   | rv1736c | 1.99        | Nitrate reductase-like protein (NarX)        | rv3136  | 1.61        | PPE family protein (PPE51)                    |
|   | rv1737c | 2.66        | Nitrate/nitrite transporter (NarK2)          | rv3136A | 1.52        | Hypothetical protein                          |
|   | rv1738  | 2.64        | Hypothetical protein                         | rv3159c | -1.56       | PPE family protein (PPE53)                    |
|   | rv1739c | 2.98        | Sulfate ABC transporter permease             | rv3614c | 1.60        | ESX-1 secretion-associated protein (EspD)     |
|   | rv1806  | 1.70        | PE family protein (PE20)                     | rv3615c | 1.77        | ESX-1 secretion-associated protein (EspC)     |
|   | rv1812c | 1.55        | Putative dehydrogenase                       | rv3633  | 1.67        | Hypothetical protein                          |
|   | rv1813c | 4.45        | Hypothetical protein                         | rv3846  | 1.59        | Superoxide dismutase A (SodA)                 |
|   | rv1869c | -1.62       | Putative reductase                           | rv3854c | -1.51       | Monooxygenase (EthA)                          |
|   | rv1870c | -1.51       | Hypothetical protein                         | rv3891c | 1.55        | ESAT-6 like protein (EsxD)                    |
|   | rv1996  | 2.12        | Universal stress protein                     | rv3914  | 1.51        | Thioredoxin (TrxC)                            |
|   | rv1997  | 1.74        | Cation transporter ATPase F (CtpF)           | rv3918c | -1.56       | Chromosome partitioning protein (ParA)        |
|   | rv2007c | 3.37        | Ferredoxin A (FdxA)                          | rv3919c | -1.53       | rRNA small subunit methyltransferase G        |

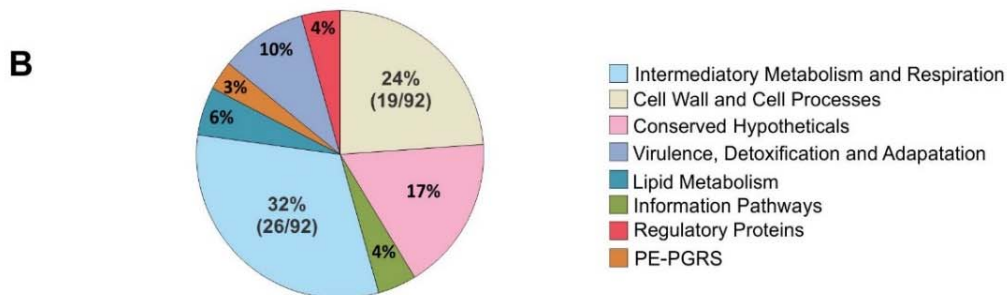

**Supplementary Figure 10. Transcriptomic analysis of *Mtb* cells exposed to GYY4137.**

(A) RNAseq based gene expression analysis showing differentially regulated genes in *Mtb* cells following exposure to 25  $\mu$ M GYY4137 for 1 hr. Each experiment was performed with 3 biological replicates. (B) Pie diagram showing differentially regulated genes based on their classification in the TubercuList database. Numbers in parentheses indicate number of class genes relative to the total number.

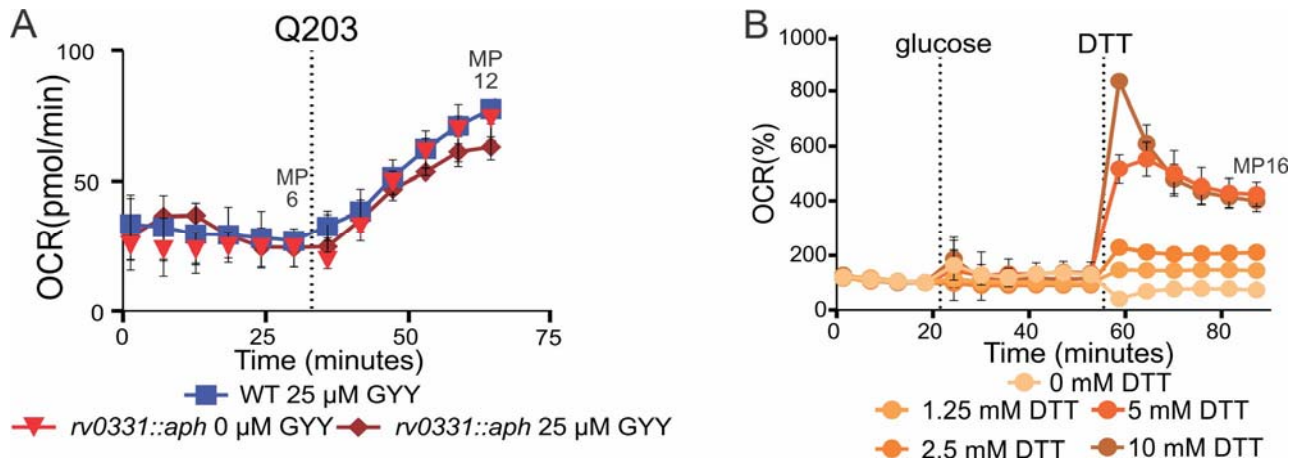

**Supplementary Figure 11. Effect of SQR and DTT on *Mtb* OCR.** (A) *Mtb* *sqr* has little effect on OCR in the presence of H<sub>2</sub>S. WT *Mtb* CDC1551 and a putative *sqr* mutant strain (*rv0331::aph*; Johns Hopkins library, HG0913, point of insertion at base pair 552 of 1167) was examined in the XF96. GYY4137 was added to the bacilli immediately before the start of the experiment. Six basal respiration measurements were taken before the addition of Q203 (0.3  $\mu$ M, 100x MIC<sub>50</sub>), followed by the final six measurements. No significant reduction was observed in the OCR of *rv0331::aph* compared to WT following H<sub>2</sub>S addition. (B) Percent (%) OCR following addition of glucose and DTT. Four measurements representing basal respiration were taken, followed by glucose addition (final concentration of 0.2%). After glucose addition, six more measurements were taken prior to addition of DTT and the final six measurements were taken following addition of DTT. Following DTT addition, there is an immediate concentration-dependent increase in bacterial respiration. Data are shown as the mean  $\pm$  SD (n=3-4 per group).

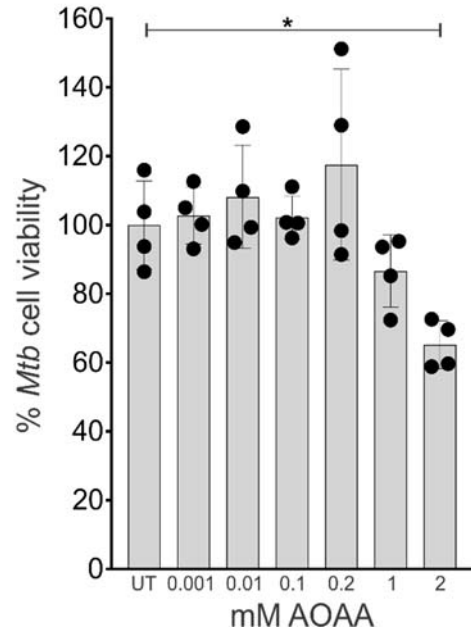

**Supplementary Figure 12. Direct effect of AOAA on *Mtb* viability.** *Mtb* cells were exposed to various concentrations of AOAA followed by exposure to Alamar blue. Data were normalized to untreated controls, and are shown as mean  $\pm$ SD (n = 4 per group). Data were analyzed by one-way ANOVA with Tukey's multiple comparisons test. \* $P < 0.05$  relative to untreated (UT) control.

**Supplementary Table 1. DNA Primers used in this study.**

| <b>Primer</b>    | <b>Sequence (5'-3')</b>         |
|------------------|---------------------------------|
| 16sRNA-For       | GAAGAATGAGCCTGCGAGTC            |
| 16sRNA-Rev       | GGTCCAGAACACGCCACTAT            |
| hspX-For         | CGCACCGAGCAGAAGGAC              |
| hspX-Rev         | CCGCCACCGACACAGTAA              |
| fdxA-For         | CCTATGTGATCGGTAGTGA             |
| fdxA-Rev         | GGTTGATGTAGAGCATT               |
| rv1813-For       | GGTTCCTATCCCTCCGATTATCC         |
| rv1813-Rev       | TCTAGTGCGACTTGCTCTGCTC          |
| rv1620c cydC-For | TATCCATGGTAATGAACCGACCGAGTGCTG  |
| rv1620c cydC-Rev | CTGAAGCTTCGGCGTTACGTGCTGATATCGA |
